# Supplementary material
Source: Springer Nature journal article supplement (https://www.springermedizin.de/resource/supplementary/12974_2011_473_MOESM3_ESM.pdf/9601366)

## Effect of cytokines on mouse brain endothelial (bEnd-3) metabolism

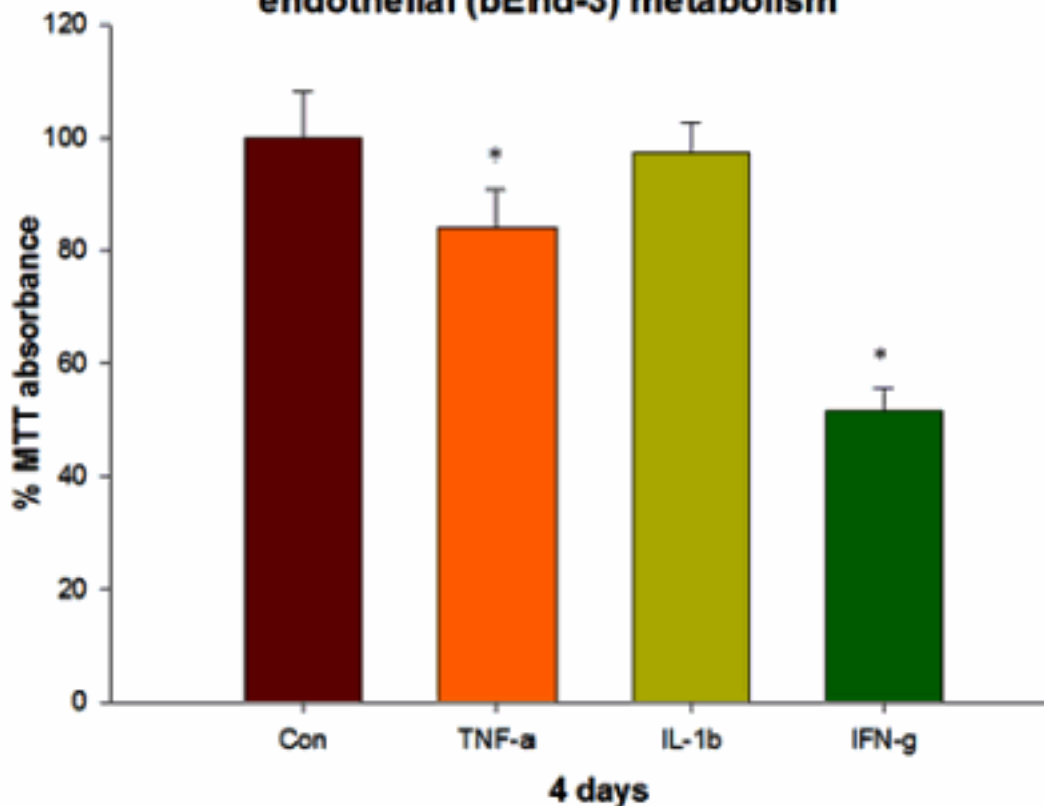

Supplement: MOESM3 [file 9601366]
